# Supplementary material for: Outbreak of imported diphtheria with Corynebacterium diphtheriae among migrants arriving in Germany, 2022
Source: PubMed Central journal article supplement (PMC9673234; doi:10.2807/1560-7917.es.2022.27.46.2200849), 2022-11-17
Supplement: 2200849_SupplementaryMaterial.pdf [file 2200849_SupplementaryMaterial.pdf]

# Supplementary Material

This supplementary material is hosted by *Eurosurveillance* as supporting information alongside the article **“Outbreak of imported diphtheria with *Corynebacterium diphtheriae* among migrants arriving in Germany, 2022”** on behalf of the authors who remain responsible for the accuracy and appropriateness of the content. The same standards for ethics, copyright, attributions and permissions as for the article apply. Supplements are not edited by Eurosurveillance and the journal is not responsible for the maintenance of any links or email addresses provided therein.

## **S1: Routine and intensified diphtheria surveillance in Germany**

In Germany, clinical suspicion, proof of diphtheria disease or death as well as the identification of DT producing *Corynebacterium (C.)* spp. are notifiable to the local health authority [1]. Case definition categories comprise [2]:

- clinical disease with epidemiological link,
- clinically and laboratory-confirmed disease,
- laboratory-confirmed infection without clinical confirmation, and
- laboratory-confirmed infection with unknown clinical status.

The reference definition for official statistics includes cases of the first two categories [2]. This currently used German case definition became effective in 2017 [3].

Most diphtheria-related strains isolated in Germany are analysed for confirmation and toxigenicity testing at the National Consiliary Laboratory on Diphtheria (NCLD).

Routine diphtheria surveillance in Germany is based on a standardised data entry mask for diphtheria cases that is mandatory for any case that is notifiable and to be reported by law.

An intensified diphtheria surveillance has been established in Germany in 2019 and shall provide additional information, e.g. on diphtheria antitoxin (DAT) use, antimicrobial resistances, contact persons and travel history, if applicable. Participation in the intensified diphtheria surveillance is voluntary and comprises a case-based questionnaire.

## **S2: Laboratory methods**

After the initial swab culture on Hoyle’s Tellurite agar (BD Life Sciences, Heidelberg, Germany) and Columbia blood agar (Oxoid, Wesel, Germany) for 24-48 hours at 37°C and in 5% CO<sub>2</sub>, *C. diphtheriae* strains were identified by biochemical differentiation (API CORYNE; bioMerieux SA, Marcy l’Etoile, France) and matrix-assisted laser desorption/ionisation time-of-flight mass spectrometry (MALDI-TOF MS; MALDI Biotyper; Bruker Daltonics, Bremen, Germany) [4].

Antimicrobial susceptibility testing was performed on Mueller-Hinton-Agar (supplemented with 5% horse blood) by Etest (bioMerieux SA, Marcy l’Etoile, France) after overnight incubation at 37°C and in 5% CO<sub>2</sub>. Minimum inhibitory concentrations were determined according to the guideline of the European Committee on Antimicrobial Susceptibility Testing (EUCAST), version 12 [5], and the Clinical and Laboratory Standards Institute (CLSI) M45 2015 guidelines [6].

Toxigenicity was verified by real-time-PCR [7] and a modified Elek test [8].

Whole genome sequencing (WGS) was performed after DNA extraction from isolates on blood agar plates [9] and Illumina DNA preparation on a NextSeq (Illumina, San Diego, CA, USA) with 2 x 75 bp. For a phylogenetic analysis, multi locus sequence typing (MLST) and core genome (cg) MLST were performed in Ridom SeqSphere+ (Ridom, Munster, Germany) using the 7 MLST target regions *atpA*, *dnaE*, *dnaK*, *fusA*, *leuA*, *odhA* described in [10] and an ad-hoc *C. diphtheriae* cgMLST scheme of 1553 target loci described in [9] in comparison to genome sequences of isolates sequenced earlier. Duplicate isolates from the same persons were excluded after it was verified that they were genetically identical. WGS assemblies were searched for acquired resistance genes using the card database [11], using abricate [12] (data not shown).

**S3 – Supplementary Table: Accession numbers of WGS data at NCBI under bioproject PRJNA898270**

| <b>Sample ID</b> | <b>Biosample accession</b> | <b>SRA accession</b> |
|------------------|----------------------------|----------------------|
| KL1938           | SAMN31602458               | SRR22189726          |
| KL1958           | SAMN31602459               | SRR22189725          |
| KL1961           | SAMN31602460               | SRR22189714          |
| KL2070           | SAMN31602461               | SRR22189703          |
| KL2125           | SAMN31602462               | SRR22189692          |
| KL2128           | SAMN31602463               | SRR22189686          |
| KL2129           | SAMN31602464               | SRR22189685          |
| KL2130           | SAMN31602465               | SRR22189684          |
| KL2137           | SAMN31602466               | SRR22189683          |
| KL2139           | SAMN31602467               | SRR22189682          |
| KL2141           | SAMN31602468               | SRR22189724          |
| KL2142           | SAMN31602469               | SRR22189723          |
| KL2143           | SAMN31602470               | SRR22189722          |
| KL2147           | SAMN31602471               | SRR22189721          |
| KL2151           | SAMN31602472               | SRR22189720          |
| KL2158           | SAMN31602473               | SRR22189719          |
| KL2160           | SAMN31602474               | SRR22189718          |
| KL2165           | SAMN31602475               | SRR22189717          |
| KL2168           | SAMN31602476               | SRR22189716          |
| KL2172           | SAMN31602477               | SRR22189715          |
| KL2176           | SAMN31602478               | SRR22189713          |
| KL2183           | SAMN31602479               | SRR22189712          |
| KL2184           | SAMN31602480               | SRR22189711          |
| KL2187           | SAMN31602481               | SRR22189710          |
| KL2189           | SAMN31602482               | SRR22189709          |
| KL2193           | SAMN31602483               | SRR22189708          |
| KL2196           | SAMN31602484               | SRR22189707          |
| KL2197           | SAMN31602485               | SRR22189706          |
| KL2199           | SAMN31602486               | SRR22189705          |
| KL2202           | SAMN31602487               | SRR22189704          |
| KL2203           | SAMN31602488               | SRR22189702          |
| KL2204           | SAMN31602489               | SRR22189701          |
| KL2206           | SAMN31602490               | SRR22189700          |
| KL2213           | SAMN31602491               | SRR22189699          |
| KL2214           | SAMN31602492               | SRR22189698          |
| KL2219           | SAMN31602493               | SRR22189697          |
| KL2220           | SAMN31602494               | SRR22189696          |
| KL2221           | SAMN31602495               | SRR22189695          |
| KL2224           | SAMN31602496               | SRR22189694          |
| KL2225           | SAMN31602497               | SRR22189693          |

| Sample ID | Biosample accession | SRA accession |
|-----------|---------------------|---------------|
| KL2230    | SAMN31602498        | SRR22189691   |
| KL2232    | SAMN31602499        | SRR22189690   |
| KL2233    | SAMN31602500        | SRR22189689   |
| KL2234    | SAMN31602501        | SRR22189688   |
| KL2239    | SAMN31602502        | SRR22189687   |

## References

1. Gesetz zur Verhütung und Bekämpfung von Infektionskrankheiten beim Menschen (Infektionsschutzgesetz - IfSG) [Infection Protection Law] [Internet]. 2020. Available from: <https://www.gesetze-im-internet.de/ifsg/BJNR104510000.html>
2. Robert Koch Institute (RKI). Falldefinitionen des Robert Koch-Instituts zur Übermittlung von Erkrankungs- oder Todesfällen und Nachweisen von Krankheitserregern [Case definitions of RKI for reporting of cases of disease or death and confirmation of pathogens]. 2019; Available from: [www.rki.de/falldefinitionen](http://www.rki.de/falldefinitionen)
3. Robert Koch Institute (RKI). Änderungen des Infektionsschutzgesetzes, Juli 2017 [Change of Infection Protection Law, July 2017]. *Epidemiol Bull* [Internet]. 2017;(31):297–314. Available from: [https://www.rki.de/DE/Content/Infekt/EpidBull/Archiv/2017/Ausgaben/31\\_17.pdf](https://www.rki.de/DE/Content/Infekt/EpidBull/Archiv/2017/Ausgaben/31_17.pdf)
4. Konrad R, Berger A, Huber I, Boschert V, Hörmansdorfer S, Busch U, et al. Matrix-assisted laser desorption/ionisation time-of-flight (MALDI-TOF) mass spectrometry as a tool for rapid diagnosis of potentially toxigenic *Corynebacterium* species in the laboratory management of diphtheria-associated bacteria. *Eurosurveillance* [Internet]. 2010;15(43):1–5. Available from: <http://dx.doi.org/10.2807/ese.15.43.19699-en>
5. The European Committee on Antimicrobial Susceptibility Testing (EUCAST). Breakpoint tables for bacteria, version 12.0 [Internet]. 2022 [cited 2022 Oct 24]. Available from: [https://www.eucast.org/clinical\\_breakpoints](https://www.eucast.org/clinical_breakpoints)
6. Clinical and Laboratory Standards Institute (CLSI). M45 Methods for Antimicrobial Dilution and Disk Susceptibility Testing of Infrequently Isolated or Fastidious Bacteria. 2015.
7. Schuegger R, Lindermayer M, Kugler R, Heesemann J, Busch U, Sing A. Detection of toxigenic *Corynebacterium diphtheriae* and *Corynebacterium ulcerans* strains by a novel real-time PCR. *J Clin Microbiol*. 2008;46(8):2822–3.
8. Melnikov VG, Berger A, Sing A. Detection of diphtheria toxin production by toxigenic corynebacteria using an optimized Elek test. *Infection* [Internet]. 2022;(0123456789). Available from: <https://doi.org/10.1007/s15010-022-01903-x>
9. Dangel A, Berger A, Konrad R, Bischoff H, Sing A. Geographically diverse clusters of nontoxigenic *Corynebacterium diphtheriae* infection, Germany, 2016–2017. *Emerg Infect Dis*. 2018;24(7):1239–45.
10. Bolt F, Cassidy P, Tondella ML, DeZoysa A, Efstratiou A, Sing A, et al. Multilocus sequence typing identifies evidence for recombination and two distinct lineages of *Corynebacterium diphtheriae*. *J Clin Microbiol*. 2010;48(11):4177–85.
11. McArthur AG, Waglechner N, Nizam F, Yan A, Azad MA, Baylay AJ, et al. The comprehensive antibiotic resistance database. *Antimicrob Agents Chemother*. 2013;57(7):3348–57.
12. Seemann T. ABRicate. Mass screening of contigs for antimicrobial resistance or virulence genes. [Internet]. 2020 [cited 2022 Oct 22]. Available from: <https://github.com/tseemann/abricate>
